# Supplementary material
Source: publisher figshare collection journal article supplement (https://karger.figshare.com/articles/dataset/_/5374936)
Supplement: Supplementary file 1 [file 2]

### 3.5 Innerliche Behandlung der Schuppenflechte

Eine innerliche Therapie der Schuppenflechte wird immer dann notwendig, wenn ein mittelschwerer bis schwerer Befall vorliegt oder wenn äußerliche Therapien und Lichttherapie nicht zu einem Erfolg geführt haben. Weitere Gründe für eine innerliche Behandlung wurden bereits im Kapitel 2.10 besprochen. Insbesondere zählen dazu der Befall von sichtbaren Hautflächen wie Gesicht, Hals, Hände und Nägel, aber auch der Befall des Genitalbereichs.

Für die innerliche Behandlung, auch «systemische Therapie» genannt, stehen eine Reihe von wirksamen Medikamenten zur Verfügung (Tab. 1). Allen ist gemeinsam, dass die Anwendung mit großer Sorgfalt und unbedingt nach den Anweisungen des behandelnden Arztes erfolgen muss. Von besonderer Bedeutung ist die Einhaltung der empfohlenen Termine für ärztliche Kontrolluntersuchungen. Diese sind immer mit regelmäßigen Blutentnahmen verbunden um eventuelle Risiken der Therapie frühzeitig erkennen zu können. Verhaltens- und/oder Diätempfehlungen (z.B. Meiden von alkoholischen Getränken) sollten unbedingt befolgt werden.

Studien aus den letzten Jahren haben gezeigt, dass alle innerlich angewendeten Medikamente bei Menschen mit Übergewicht (body mass index (BMI) über 30 kg/m<sup>2</sup>) schlechter wirken, das gilt auch für die modernen Biologika. Daher sollte bei Übergewicht neben der Medikamententherapie immer eine Gewichtsreduktion durchgeführt werden. Bei Menschen mit einem BMI von über 40 kg/m<sup>2</sup> sollte eine Operation mit Magenverkleinerung angestrebt werden.

Die Auswahl einer innerlichen Therapie erfolgt unter Beachtung festgelegter Regeln. Diese werden von den Arzneimittelbehörden aufgestellt (sogenanntes Label) und durch Behandlungsleitlinien und durch das bestehende Wirtschaftlichkeitsgebot für die Verordnung ergänzt. Dabei muss der Arzt mit mindestens einem Medikament aus der Gruppe der Erstlinienmedikamente beginnen. Ist die Wirkung nicht ausreichend, wurde der Wirkstoff nicht vertragen oder bestand eine Gegenanzeige, können Medikamente aus der Gruppe der Zweitlinienmedikamente gegeben werden. Tabelle 1 zeigt die in Deutschland zugelassenen Medikamente und ihre Zuordnung zu den beiden Gruppen nach der Leitlinie. Bei den Erstlinienmedikamenten befinden sich seit 2015 auch Biologika, die einen sehr viel höheren Preis haben. Jedoch kann der Arzt nur unter be-

**Tab. 1.** Innerliche Medikamente zur Behandlung der Schuppenflechte

| Wirkstoff(e)           | Handelsname(n)                                  | Erstlinientherapie/<br>Zweitlinientherapie | Zulassung für<br>Psoriasis<br>(Pso)/<br>Psoriasis-<br>Arthritis (PsA) | Bemerkungen                         |
|------------------------|-------------------------------------------------|--------------------------------------------|-----------------------------------------------------------------------|-------------------------------------|
| Acitretin              | z.B. Neotigason®                                | Erstlinientherapie                         | Pso                                                                   | Kapseln                             |
| Apremilast             | Otezla®                                         | Zweitlinientherapie                        | Pso/PsA                                                               | Tabletten                           |
| Ciclosporin            | z.B. Immunosporin®,<br>Ciclosporin Pro®         | Erstlinientherapie                         | Pso/PsA                                                               | Kapseln                             |
| Fumar-<br>säureester   | Fumaderm® initial,<br>Fumaderm®,<br>Skilarence® | Erstlinientherapie                         | Pso                                                                   | Tabletten                           |
| Methotrexat            | z.B. Metex®                                     | Erstlinientherapie                         | Pso/PsA                                                               | Spritzen, Tabletten                 |
| <b>Biologika</b>       |                                                 |                                            |                                                                       |                                     |
| Adalimumab             | Humira®                                         | Erstlinientherapie                         | Pso/PsA                                                               | Spritzen                            |
| Brodalumab             | Kyntheum®                                       | Erstlinientherapie                         | Pso                                                                   | Spritzen                            |
| Certolizumab-<br>Pegol | Cimzia®                                         | Zweitlinientherapie                        | PsA                                                                   | Spritzen                            |
| Etanercept             | z.B. Enbrel®                                    | Zweitlinientherapie                        | Pso/PsA                                                               | Spritzen, Biosimilars<br>zugelassen |
| Golimumab              | Simponi®                                        | Zweitlinientherapie                        | PsA/PsA                                                               | Spritzen                            |
| Guselkumab             | Tremfya®                                        | Erstlinientherapie                         | Pso                                                                   | Spritzen                            |
| Infliximab             | z.B. Remicade®                                  | Zweitlinientherapie                        | Pso/PsA                                                               | Infusion, Biosimilars<br>zugelassen |
| Ixekizumab             | Taltz®                                          | Erstlinientherapie                         | Pso/PsA                                                               | Spritzen                            |
| Secukinumab            | Cosentyx®                                       | Erstlinientherapie                         | Pso/PsA                                                               | Spritzen                            |
| Ustekinumab            | Stelara®                                        | Zweitlinientherapie                        | Pso/PsA                                                               | Spritzen                            |

sonderen Bedingungen ein solches gleich als erstes auswählen, da er bei jeder Verordnung auch das Wirtschaftlichkeitsgebot beachten muss. Daher werden die meisten Patienten zunächst mit einem «konventionel-» Wirkstoff behandelt.

### 3.5.1 Retinoide (Acitretin)

Der Wirkstoff Acitretin (z.B. Neotigason®) gehört in die Gruppe der Vitamin-A-Abkömmlinge, die auch als Retinoide bezeichnet werden. Jedoch besitzt er keinerlei Vitaminwirkung mehr, sondern reguliert vor allem die bei der Schuppenflechte gestörte Erneuerung der Oberhautzellen. Die therapeutische Wirkung von Acitretin allein ist im Vergleich zu anderen innerlich verabreichten Medikamenten zur Behandlung der Schuppenflechte schwach. In der Kombination mit einer PUVA-Therapie (siehe Kapitel 3.7.2), die auch als «Re-PUVA» bezeichnet wird, kann eine deutliche Wirkungsverstärkung erreicht werden.

Die Behandlung mit Acitretin kann mit einer Reihe von Nebenwirkungen verbunden sein, die der besonderen Wirkung auf die Oberhautzellen geschuldet sind. Während der Behandlung werden die Lippen sehr trocken und spröde, und es kann zu Mundtrockenheit kommen. Auch an den Augen kann es zu einem Trockenheits- und Fremdkörpergefühl kommen. Gelegentlich tritt unter einer längerdauernden Acitretin-Behandlung Haarverlust auf, der jedoch nach Absetzen des Medikaments in aller Regel wieder zurückgeht.

Der Arzt muss während der Therapie mit Acitretin regelmäßig das Blut kontrollieren. Besonders die Funktion der Leber, das Blutbild (vor allem die Zahl der weißen und der roten Blutkörperchen) und die Blutfettwerte werden dabei überwacht. Kommt es zu Veränderungen dieser Werte, muss die Acitretin-Dosis vermindert oder das Medikament abgesetzt werden.

Ein wesentlicher Nachteil von Acitretin ist, dass es von Frauen im gebärfähigen Alter nicht eingenommen werden darf. Kommt es unter der Therapie mit diesem Wirkstoff zu einer Schwangerschaft, so sind Fehlbildungen beim Kind fast sicher. Da ein Abbauprodukt von Acitretin im Fettgewebe des Körpers gespeichert wird, können diese Fehlbildungen bis zu 3 Jahre nach Einnahme der letzten Kapsel immer noch auftreten. Patienten, die Acitretin einnehmen, dürfen auf keinen Fall Blut spenden, damit diese erhebliche Nebenwirkung nicht bei weiblichen Empfängern von Blutkonserven auftreten kann.

Ein Vorteil von Acitretin liegt darin, dass nach gegenwärtigem Wissensstand auch nach längerer Einnahme keine anderen Risiken, wie z.B. eine Entwicklung von Hauttumoren, auftreten. Eine Kombination von

Acitretin mit lokal wirksamen Medikamenten wie Kortikoiden, Vitamin-D<sub>3</sub>-artigen Wirkstoffen und Anthralin ist möglich.

### 3.5.2 Apremilast

Der Wirkstoff Apremilast (Otezla®) ist der erste Vertreter einer neuen Klasse von Medikamenten in der Dermatologie, die das Enzym Phosphodiesterase 4 (PDE4) in Zellen hemmen. PDE4 ist als Enzym vor allem für den Abbau des wichtigen Botenstoffs «zyklisches Adenosinmonophosphat» (cAMP) im Zellinneren zum «einfachen» Adenosinmonophosphat (AMP) verantwortlich. Besonders in Entzündungszellen ist die PDE4-Aktivität hoch, was zum vermehrten Abbau von cAMP zu AMP führt. Niedrige Spiegel von cAMP in den Zellen fördern die Bildung entzündungsfördernder Botenstoffe. Die Hemmung von PDE4 durch Apremilast führt daher zum Anstieg der zellulären cAMP-Konzentration und zur Wiederherstellung einer Balance in der Zelle, die auch die Bildung entzündungshemmender Botenstoffe fördert.

Apremilast ist zur Zweitlinientherapie der mittelschweren bis schweren Schuppenflechte der Haut und der Psoriasis-Arthritis zugelassen.

Um eine gute Verträglichkeit zu sichern, wird die Menge von Apremilast von 10 mg am ersten Tag über 5 Tage auf die Erhaltungsdosis von 30 mg morgens und abends gesteigert, hierzu wird eine sehr gute und übersichtliche Verpackung der Tabletten angeboten. Die Dosierung ist für die Schuppenflechte der Haut und die Psoriasis-Arthritis gleich.

Die Wirkstärke von Apremilast ist insgesamt eher niedrig, jedoch zeigen einige Patienten auch ein sehr gutes Ansprechen. Da es keine Vorhersagemöglichkeit für gutes Ansprechen gibt, sollte nach etwa 16 Wochen die Wirkung überprüft und bei ungenügendem Ansprechen auf ein anderes Medikament umgestellt werden. Patienten, bei denen die Behandlung mit Apremilast gut wirksam und verträglich ist, können nach heutigem Wissensstand langfristig mit dem Medikament behandelt werden. Es gibt erste Hinweise darauf, dass Apremilast eine vergleichsweise gute Wirkung bei bestehendem Jucken zeigt, bei einer kleinen Gruppe von Patienten kann es zu einem Gewichtsverlust kommen, was bei Übergewichtigen eventuell von Vorteil sein kann. Bei untergewichtigen Patienten sollte das Körpergewicht regelmäßig kontrolliert werden.

Die wichtigsten Nebenwirkungen von Apremilast sind Magen-Darm-Beschwerden, besonders Durchfall, die vor allem in der ersten Therapiewoche auftreten. Bei fortgesetzter Therapie können sich die Beschwerden bessern, eventuell muss das Medikament aber deswegen auch abgesetzt werden. Haben Patienten eine stark eingeschränkte Nierenfunktion, sollte die Apremilast-Therapie mit dem behandelnden Arzt gut abgestimmt und die Dosis auf 30 mg/Tag reduziert werden.

Menschen, die neben der Schuppenflechte oder Psoriasis-Arthritis eine bekannte psychiatrische Erkrankung haben, weisen möglicherweise ein erhöhtes Risiko für Selbstmordgedanken auf. In diesen Fällen ist die Gabe von Apremilast mit den beteiligten Ärzten abzustimmen.

Der Gesetzgeber sieht für die Therapieüberwachung bei Apremilast keine Maßnahmen vor. In der Psoriasis-Leitlinie wird jedoch eine einfache Blutuntersuchung alle 3 Monate empfohlen.

Eine Kombination von Apremilast ist mit allen äußerlich angewendeten Medikamenten möglich. Eine Kombination mit UV-Licht kann bislang nicht empfohlen werden. Zu einer Kombination mit anderen innerlich angewendeten Medikamenten liegen nur unzureichende Daten vor, daher können derartige Kombinationen derzeit auch nicht empfohlen werden.

### 3.5.3 Fumarsäure-Ester

Die gute Wirkung von Fumarsäure-Estern (auch als «Fumarate» bezeichnet) auf die Schuppenflechte ist seit 1959 bekannt. Fumarsäure-Ester wirken über eine Regulation gestörter, für die Entzündungsreaktion wichtiger Prozesse.

Zur Behandlung wurde bislang nur eine Mischung verschiedener Fumarsäure-Ester verwendet, die als zugelassene Medikamente im Handel sind (Fumaderm®, Fumaderm® initial). Der wichtigste Wirkstoff in Fumaderm ist Dimethylfumarat (DMF). Seit Ende 2017 gibt es nun auch ein neues Medikament, das nur den Wirkstoff DMF enthält und das nicht nur in Deutschland, sondern in ganz Europa zugelassen ist (Skilarence®).

Die Therapie wird nach einem festgelegten Einnahmeschema durchgeführt. Zu Beginn der Behandlung wird Fumaderm initial oder Skilarence 30 mg 1× täglich in der 1. Woche, 2× täglich in der 2. Woche und 3× täglich in der 3. Woche eingenommen. Bei guter Verträglichkeit

wird ab der 4. Woche auf das stärkere Präparat Fumaderm oder Skilarence 120 mg umgestellt und wiederum mit 1 Tablette pro Tag begonnen. Die Anzahl der Tabletten pro Tag wird dann wöchentlich jeweils um 1 Tablette gesteigert, bis eine Höchstdosis von  $3 \times 2$  Tabletten pro Tag erreicht ist. Die Gesamtmenge der eingenommenen Tabletten hängt vom Ansprechen der Schuppenflechte auf die Behandlung ab. Genügt bei manchen Patienten schon 1 Tablette Fumaderm/Skilarence, so sind bei anderen 6 Tabletten pro Tag nötig, um die gleiche Verbesserung des Hautzustands zu erreichen. Es sollte immer versucht werden, mit möglichst wenigen Tabletten pro Tag auszukommen. Neu ist, dass die Skilarence-30-mg-Tabletten nicht nur zu Beginn der Therapie angewendet werden sollen, sondern auch während der Aufdosierungsphase und in der Erhaltungstherapie zur besseren Verträglichkeit mit den 120-mg-Tabletten von Skilarence kombiniert werden können.

Die Fumarsäure-Ester-Therapie eignet sich vor allem für die normale Form der Schuppenflechte (Psoriasis vulgaris). Bei länger dauernder Behandlung bessern sich auch befallene Nägel. Fumarate wirken bei Psoriasis-Arthritis nicht.

Der guten Wirkung der Fumarate stehen eine Reihe von Nebenwirkungen gegenüber. Häufig leiden Patienten während der Behandlung an Störungen des Magen-Darm-Trakts. Diese können sich in Unwohlsein nach Tabletteneinnahme, aber auch in schweren Durchfällen äußern. Typische Nebenwirkungen dieses Medikaments sind aufsteigende Hitze und Rötung des Gesichts, bis hin zu Kopfschmerzen (sogenannte Flush-Symptome), die nur wenige Minuten oder aber bis zu Stunden andauern können. Da unter einer Fumarsäure-Ester-Therapie bestimmte weiße Blutkörperchen vermindert, andere dagegen vermehrt auftreten können, müssen regelmäßige Kontrolluntersuchungen beim behandelnden Arzt durchgeführt werden. Neben dem Blutbild werden auch Leber- und Nierenwerte sowie der Urin kontrolliert, da es in seltenen Fällen zu einer vermehrten Eiweißausscheidung im Harn unter Fumarsäure-Ester-Therapie kommen kann.

Prinzipiell kann mit Fumarsäure-Estern eine zeitlich unbegrenzte Dauerbehandlung durchgeführt werden. Hierfür ist die regelmäßige Kontrolle durch den Arzt Voraussetzung. Die Behandlung kann mit äußerlich wirksamen Medikamenten wie Kortikoiden, Vitamin D<sub>3</sub> und

dessen Abkömmlingen oder Anthralin kombiniert werden. Mit anderen innerlich wirksamen Medikamenten oder UV-Licht sollte nur in Ausnahmefällen gleichzeitig behandelt werden.

#### 3.5.4 Ciclosporin

Seit Anfang der 1980er Jahre wird der Wirkstoff Ciclosporin weltweit bei Patienten angewendet, die ein Organ eingepflanzt bekommen haben. Das Medikament verhindert, dass der Körper das fremde Organ wieder abstößt. Schon bald zeigte sich auch eine sehr gute Wirkung von Ciclosporin bei Patienten mit Schuppenflechte. Ciclosporin-haltige Medikamente sind zur Therapie der Schuppenflechte zugelassen.

Ciclosporin beeinflusst vor allem die Aktivität von Entzündungszellen (Lymphozyten), die bei der Schuppenflechte eine wichtige Rolle spielen. Das Medikament wird in Form von Kapseln oder als Trinklösung 2× täglich eingenommen. Die Dosierung wird auf das Körpergewicht bezogen.

Ciclosporin eignet sich vor allem zur Behandlung der Psoriasis vulgaris. Aber auch Formen der Schuppenflechte mit Pustelbildung und/oder Rötung der gesamten Haut des Körpers (sogenannte Erythrodermie) sprechen gut an. Meist zeigt sich eine deutliche Verbesserung des Hautzustands nach 4–6 Wochen. Bei Patienten, die besonders gut auf Ciclosporin ansprechen, kann eine völlige Erscheinungsfreiheit erreicht werden.

Zu den Nebenwirkungen einer Therapie mit Ciclosporin gehören eine Einschränkung der Nierenfunktion, die Entstehung oder Verschlechterung eines Bluthochdrucks, Zahnfleischwucherungen, verstärkter Haarwuchs und Müdigkeit. Daher müssen während der Behandlung mit Ciclosporin regelmäßige Kontrolluntersuchungen beim Arzt stattfinden. Hier wird der Blutdruck kontrolliert, und mittels einer Blutentnahme werden Nieren-, Blut-, Leber- und Blutfettwerte bestimmt. Da es, vor allem bei Patienten, die zur Behandlung ihrer Schuppenflechte schon sehr häufig eine PUVA-Therapie bekommen haben, während oder nach der Einnahme von Ciclosporin zur Entwicklung oberflächlicher Hauttumoren (heller Hautkrebs und seine Vorstufen) kommen kann, muss der behandelnde Arzt auch die Haut genau kontrollieren.

In den meisten Fällen wird mit Ciclosporin die Kurzzeit-Intervall-Therapie durchgeführt. Hierbei wird nur so lange Ciclosporin eingenommen, bis der Hautzustand sich wesentlich verbessert hat. Dann wird das

Medikament abgesetzt und z.B. mit Cremes oder Salben, eventuell auch mit anderen innerlich verabreichten Medikamenten, weiterbehandelt. Diese Anwendungsform hat den Vorteil, dass das Risiko von Nebenwirkungen deutlich begrenzt wird oder solche gar nicht auftreten. Kommt es wieder zu einer Verschlechterung der Schuppenflechte, die eine innerliche Behandlung erforderlich macht, kann Ciclosporin in gleicher Weise wieder eingesetzt werden.

Bei sehr schweren Verlaufsformen der Schuppenflechte mit hoher Krankheitsaktivität kann es notwendig sein, die Behandlung mit Ciclosporin über längere Zeit ununterbrochen durchzuführen. In diesen Fällen wird versucht, mit der niedrigsten Dosis auszukommen, durch die noch eine ausreichende Kontrolle der Hautveränderungen möglich ist. Regelmäßige Kontrolluntersuchungen helfen dem Arzt, eventuell auftretende Nebenwirkungen zu erkennen und geeignete Maßnahmen zu ergreifen.

Die Behandlung mit Ciclosporin kann mit lokalen Maßnahmen wie beispielsweise der Anwendung von Kortikoiden, Anthralin sowie Vitamin D<sub>3</sub> und dessen Abkömmlingen kombiniert werden. Eine gleichzeitige Behandlung mit UV-Licht darf nicht durchgeführt werden. Eine Kombination von Ciclosporin mit anderen innerlich wirksamen Medikamenten kann in Einzelfällen erfolgen.

### 3.5.5 Methotrexat

Der Wirkstoff Methotrexat (MTX) wird schon seit den 1950er Jahren zur innerlichen Behandlung der Schuppenflechte eingesetzt. Der wichtigste Einsatz von MTX ist allerdings die Behandlung von besonderen Formen der Psoriasis-Arthritis und des Gelenk-Rheumas (rheumatoide Arthritis).

MTX wirkt auf verschiedene Faktoren, die an der Entstehung von Psoriasis-Herden beteiligt sind. Der Wirkstoff bremst die zu schnelle Zellerneuerung der Oberhautzellen und hemmt die Aktivität von Entzündungszellen in der Haut und in den betroffenen Gelenken.

MTX kann in Form von Tabletten eingenommen oder als Spritze verabreicht werden. Bevorzugt wird wegen der besseren Wirkung in der Regel die Gabe von MTX als Spritze subkutan (in die Haut), die 1× pro Woche vorgenommen wird. Sie ermöglicht eine gute Aufnahme des Wirkstoffs in den Körper und eine sichere Steuerung der Therapie. Die



Behandlung mit Tabletten setzt Erfahrung und sehr große Genauigkeit des Patienten voraus. Bei Abweichungen vom Behandlungsschema kann es entweder zu einer unzureichenden Wirkung oder aber zu Vergiftungserscheinungen kommen.

Die Behandlung mit MTX gehört zur Standardtherapie der Schuppenflechte und wird auch bei den pustulösen Formen häufig verwendet.

Selten kann MTX schwere Blutbildveränderungen auslösen; daher ist die Einhaltung der ärztlich empfohlenen Kontrolluntersuchungen auch zu Beginn der Behandlung sehr wichtig. Vor allem bei Menschen mit Übergewicht und Zuckerkrankheit kann es zu einer Einschränkung der Leberfunktion kommen sowie zu Veränderungen des Lebergewebes selbst. Auch diese möglichen Nebenwirkungen lassen sich durch entsprechende Kontrolluntersuchungen erfassen. Um die unerwünschten Wirkungen von MTX geringer zu halten, wird die Gabe von Folsäure (5 mg als Tablette) am Tag nach der MTX-Gabe empfohlen. MTX darf nicht mit Medikamenten kombiniert werden, die zu einer Wechselwirkung führen. So darf z.B. das oft verschriebene Antibiotikum Sulfamethoxazol-Trimetoprim (CoTrim) nicht zusammen mit MTX angewendet werden.

Die innerliche Behandlung mit MTX kann mit einer äußerlichen Gabe von Kortikoiden, Anthralin, Vitamin D<sub>3</sub> und dessen Abkömmlingen sowie mit Tazaroten kombiniert werden. Bei sehr schweren Formen der Schuppenflechte kann durch die kurzfristige Kombination von MTX und Ciclosporin schnell eine Besserung des Hautzustands erreicht werden. Anschließend wird mit nur einem der beiden Medikamente weiterbehandelt. Die Kombinationstherapie von MTX und Ciclosporin darf nur von sehr erfahrenen Ärzten kurzzeitig und unter regelmäßiger Kontrolle durchgeführt werden.

In den vergangenen Jahren wird MTX auch zusammen mit den im Folgenden besprochenen Biologika angewendet, wie es auch in der Rheumatologie üblich ist. Dabei kommen sehr niedrige Dosen von MTX (5–10 mg/Woche) zur Anwendung, die dann meist als Tabletten gegeben werden.

Häufig klagen Patienten unter MTX-Therapie über Übelkeit. Entgegen der Beschreibung in der Fachinformation («Waschzettel»/Bei-

packzettel) hilft der Genuss von Kaffee, schwarzem Tee oder Schokolade mit hohem Kakaoanteil gegen diese Übelkeit.

### 3.5.6 Biologika

Medikamente zur Behandlung der Schuppenflechte, die mit Hilfe biotechnologischer Verfahren hergestellt werden, sind meist unter der Bezeichnung «Biologika» (im Englischen «Biologics») bekannt. Sie sind Stoffen des natürlichen Abwehrsystems nachempfunden. Mit diesen Medikamenten sind sehr gezielte Eingriffe in die entzündlichen Reaktionen bei der Schuppenflechte und/oder der Psoriasis-Arthritis möglich. Allerdings ist die Anwendung an bestimmte Voraussetzungen gebunden, die der behandelnde Arzt beachten muss. Die Therapie mit Biologika ist für Patienten sinnvoll, die an mittelschweren bis schweren Formen der Schuppenflechte leiden und/oder bei denen die Gelenke stark befallen sind. Für Menschen mit nur leichten Formen der Schuppenflechte sind diese Medikamente nur unter bestimmten Voraussetzungen geeignet.

Viele dieser neuen biotechnologisch hergestellten Medikamente entsprechen den natürlichen Antikörpern, die ein wichtiger Bestandteil unseres Immunsystems sind. Da es sich immer um Eiweißstoffe handelt, müssen diese Medikamente entweder über die Vene als Infusion oder in die Haut als Spritze gegeben werden. Damit wird auch sichergestellt, dass der Wirkstoff vollständig in den Körper gelangt. Die Gabe von Infusionen erfolgt immer beim Arzt, das Spritzen in die Haut («subkutan») kann vom Patienten selbst, einer Hilfsperson oder auch durch den Arzt erfolgen.

Im Folgenden werden die zurzeit in Deutschland zur Behandlung der Psoriasis bzw. Psoriasis-Arthritis zugelassenen Biologika beschrieben.

#### 3.5.6.1 TNF- $\alpha$ -Antagonisten

Der Botenstoff TNF- $\alpha$  spielt eine wichtige und zentrale Rolle bei der Entzündung, die den Herden bei Schuppenflechte und Psoriasis-Arthritis zugrunde liegt. Zudem wird TNF- $\alpha$  bei übergewichtigen Patienten auch vom Fettgewebe bzw. von im Fettgewebe vermehrten Entzündungszellen gebildet und trägt dann maßgeblich zu einer hohen Entzün-

dungsaktivität im Körper bei. In den Schuppenflechte-Herden und in den Gelenken lässt sich TNF- $\alpha$  stark erhöht nachweisen.

Diese wissenschaftlichen Befunde zeigen, dass die Verminderung von TNF- $\alpha$  durch eine entsprechende Therapie eine sinnvolle Maßnahme darstellt. Da TNF- $\alpha$  im menschlichen Immunsystem auch für die Abwehr von Mikroorganismen wichtig ist, kann es unter einer Therapie mit TNF- $\alpha$ -Antagonisten zu einer erhöhten Infektanfälligkeit kommen. Das gilt ganz insbesondere auch für das Wiederauftreten einer früheren oder die Verschlechterung einer bisher unerkannten Tuberkulose. Daher ist vor der Behandlung mit diesen Medikamenten der Ausschluss einer Tuberkulose-Erkrankung vorgeschrieben. Dafür sind eine Röntgenuntersuchung der Lunge sowie ein Bluttest erforderlich. Vor und während der Behandlung ist eine regelmäßige Kontrolle unter anderem des Bluts notwendig, die vom behandelnden Arzt veranlasst wird.

#### 3.5.6.1.1 Adalimumab (Humira®)

Bei dem Wirkstoff Adalimumab handelt es sich um einen monoklonalen Antikörper, der als Injektion in die Haut (subkutan) jede 2. Woche gegeben wird. Ist der Behandlungserfolg nach 4 Monaten nicht ausreichend, kann das Medikament auch einmal wöchentlich gegeben werden. Adalimumab blockiert TNF- $\alpha$ . Humira ist für die Therapie der Psoriasis und der Psoriasis-Arthritis zugelassen.

Humira wirkt vergleichsweise schnell, erste Behandlungserfolge können 2–4 Wochen nach Therapiebeginn erwartet werden.

#### 3.5.6.1.2 Certolizumab-Pegol (Cimzia®)

Certolizumab-Pegol ist ein besonderes Biologikum gegen TNF- $\alpha$ , das derzeit nur zur Therapie der Psoriasis-Arthritis zugelassen ist. Der zu einem Antikörper gehörende sogenannte Fc-Teil fehlt bei Certolizumab-Pegol, dafür ist diese Stelle pegyliert. Das führt unter anderem dazu, dass Certolizumab-Pegol bei Schwangeren nicht durch die Plazenta auf das Kind übertragen werden kann. Die Wirkung ist gut, das Medikament wird zu Beginn 3× im 2-Wochen-Abstand mit 400 mg subkutan gegeben, dann in der Erhaltungstherapie 200 mg alle 2 Wochen oder 400 mg alle

4 Wochen. Studien zur Zulassung von Certolizumab-Pegol auch für die Psoriasis sind im Gange, der Effekt auf die Haut ist gut, und die Patienten sprechen in der Regel schnell an.

#### 3.5.6.1.3 Etanercept (z.B. Enbrel®)

Der Wirkstoff Etanercept ist ein Fusionsprotein (zusammengesetzter Eiweißstoff), das TNF- $\alpha$  blockiert. Enbrel ist für die Behandlung der Schuppenflechte und der Psoriasis-Arthritis zugelassen und wird als Spritze in die Haut 1–2× pro Woche gegeben. Die Gelenkbeschwerden sprechen schnell auf die Behandlung an, bei Schuppenflechte der Haut tritt die Wirkung erst nach längerer Therapiedauer (ca. 3–6 Monate) ein und bedarf in der Regel einer höheren Dosierung des Medikaments.

#### 3.5.6.1.4 Golimumab (Simponi®)

Der monoklonale Antikörper Golimumab ist nur für die Behandlung der Psoriasis-Arthritis zugelassen, hat aber auch einen positiven Effekt auf die Schuppenflechte. Die Gabe erfolgt als Spritze in die Haut alle 4 Wochen in der Erhaltungstherapie. Die Therapie spricht in der Regel schnell an.

#### 3.5.6.1.5 Infliximab (z.B. Remicade®)

Bei dem Wirkstoff Infliximab handelt es sich um einen monoklonalen Antikörper, der als Infusion in die Vene gegeben wird. Auch Infliximab blockiert den entzündungsfördernden Botenstoff TNF- $\alpha$ . Infliximab ist für die Therapie der Schuppenflechte und der Psoriasis-Arthritis zugelassen.

Infliximab ist eines der am stärksten und schnellsten wirksamen Medikamente für die Therapie der Schuppenflechte und der Psoriasis-Arthritis. Bereits 1–2 Wochen nach der ersten Infusion kommt es zu einer Besserung der Hautveränderungen, die Wirkung auf die erkrankten Gelenke ist noch schneller. Infliximab-Infusionen werden in Abständen von 8 Wochen gegeben.

#### 3.5.6.2 Interleukin-12/23-Antagonisten

Die Botenstoffe Interleukin-12 (IL-12) und vor allem Interleukin-23 (IL-23) spielen vor allem bei der Aktivierung von Entzündungszellen in der

Haut bei Schuppenflechte eine wichtige Rolle. Durch Hemmung dieser Botenstoffe kann eine wirksame Verminderung der Entzündung und damit ein guter Effekt auf die Schuppenflechte erzielt werden. Da der dafür entwickelte Antikörper eine gemeinsame sogenannte p40-Untereinheit beider Botenstoffe blockiert, wird auch vom p40-Antagonisten gesprochen.

Auch für diese Biologika ist der Ausschluss einer Tuberkulose vorgeschrieben. Dafür sind eine Röntgenuntersuchung der Lunge sowie ein Bluttest erforderlich. Vor und während der Behandlung ist eine regelmäßige Kontrolle unter anderem des Bluts notwendig, die vom behandelnden Arzt veranlasst wird.

#### 3.5.6.2.1 Ustekinumab (Stelara®)

Ustekinumab ist ein monoklonaler Antikörper, der in die Haut gespritzt wird («subkutan») und der die entzündungsfördernden Botenstoffe IL-12 und IL-23 durch Blockade der p40-Untereinheit hemmt. Ustekinumab ist für die Therapie der Schuppenflechte und der Psoriasis-Arthritis zugelassen. Die Behandlung ist sehr gut verträglich, das gilt auch für die Langzeitbehandlung über viele Jahre. Schon 2–4 Wochen nach der ersten Gabe von Ustekinumab kommt es zu einer Besserung der Hautveränderungen. Ustekinumab wird in Abständen von 12 Wochen gegeben.

#### 3.5.6.2.2 Guselkumab (Tremfya®)

Guselkumab ist der erste monoklonale Antikörper für die «subkutane» Anwendung, der nur den Botenstoff IL-23 durch Hemmung seiner p19-Untereinheit blockiert. Guselkumab ist zur Therapie der Schuppenflechte zugelassen, Studien zur Psoriasis-Arthritis werden gerade durchgeführt. Nach bisher vorliegenden Daten ist Guselkumab das effektivste und am schnellsten wirksame Medikament bei Schuppenflechte, die Verträglichkeit entspricht der von Ustekinumab. Die Gabe von Guselkumab während der Erhaltungstherapie erfolgt alle 8 Wochen.

#### 3.5.6.3 Interleukin-17-Antagonisten

Der Botenstoff Interleukin 17 (IL-17) spielt bei der Schuppenflechte aber auch bei der Psoriasis-Arthritis eine wichtige Rolle. IL-17 wird heute

als Bindeglied zwischen dem krankhaft aktivierten Immunsystem und den Oberhautzellen angesehen, die durch ihre zu schnelle Zellteilung zur Schuppenbildung führen. Auch an der Entzündung am Knochen ist IL-17 beteiligt.

Die bisher zugelassenen Biologika Ixekizumab (Taltz®) und Secukinumab (Cosentyx®) blockieren das Molekül IL-17A, der Antikörper Brodalumab den IL-17-Rezeptor A.

Die IL-17-Antagonisten sind sehr wirkstark und führen zu einer fast erscheinungsfreien Haut bei bis zu 70% der behandelten Patienten. Die Wirkung tritt sehr schnell ein und ist bereits in den ersten Wochen nach Behandlungsbeginn zu sehen. Bei Psoriasis-Arthritis sind sie ähnlich gut wirksam wie die TNF- $\alpha$ -Antagonisten.

Auch für diese neuen Moleküle muss vor Behandlungsbeginn eine Tuberkulose sicher ausgeschlossen werden. Die Verträglichkeit ist gut, regelmäßige Kontrolluntersuchungen werden empfohlen. Bei einem Teil der mit IL-17-Antagonisten behandelten Patienten kann eine Hefepilzinfektion (Candidose) im Mund- und Rachenraum auftreten, selten auch an der Speiseröhre oder an der Haut im Bereich der Falten (Achseln, unter der Brust, Leisten). Im Mund kann das zu Geschmacksstörungen oder leichtem Brennen führen, das gilt auch für den Befall der Speiseröhre. Durch eine einfache Untersuchung kann der Arzt einen Hefepilzbefall feststellen und entsprechend behandeln.

#### 3.5.6.3.1 Ixekizumab (Taltz®)

Ixekizumab wird als Spritze in die Haut verabreicht. Zu Beginn der Behandlung werden gleichzeitig zwei Spritzen gegeben, dann bis zur 12. Behandlungswoche alle 2 Wochen eine Spritze. Anschließend wird mit einer Spritze einmal im Monat weiterbehandelt.

#### 3.5.6.3.2 Secukinumab (Cosentyx®)

Secukinumab steht als Spritze in die Haut zur Verfügung, die 150 mg des Antikörpers enthält. Zur Behandlung der Schuppenflechte ist die Gabe von 300 mg zugelassen, daher müssen pro Behandlungszeitpunkt immer 2 Spritzen gegeben werden. Zu Beginn wird Secukinumab 1  $\times$  pro Woche gegeben, nach 5 Wochen erfolgt die Gabe einmal im Monat.

Bei der Behandlung der Psoriasis-Arthritis wird genauso verfahren, aber nur eine Spritze (150 mg) gegeben. Ist der Erfolg der Therapie nach 12 Wochen nicht ausreichend, kann die Dosis auf 300 mg angehoben werden, die monatlich gegeben wird.

#### 3.5.6.3.3 Brodalumab (Kyntheum®)

Brodalumab ist als Spritze in die Haut verfügbar, es wird eine Spritze alle 2 Wochen gegeben. Es unterscheidet sich von Ixekizumab und Secukinumab dadurch, dass es nicht direkt am IL-17 wirkt, sondern an dessen Rezeptor. Dadurch werden mehrere Untereinheiten der IL-17-Familie geblockt und der Entzündungskreislauf erfolgreich unterbrochen.
