# Supplementary material
Source: publisher figshare collection journal article supplement (https://karger.figshare.com/articles/dataset/_/5374936)
Supplement: Supplementary file 2 [file 2]

Ulrich Mrowietz  
Gerhard Schmid-Ott

---

# Schuppenflechte

Was Sie schon  
immer über Psoriasis  
wissen wollten

4., aktualisierte Auflage

---

**KARGER**
